# Supplementary material for: Phenotypic Diversity Analysis in Elaeagnus angustifolia Populations in Gansu Province, China
Source: MDPI journal article supplement (doi:10.3390/f14061143), 2023-05-31
Supplement: s1 [file s1]

Table S4. Descriptive statistics of phenotypic traits of four clusters. Phenotypic trait abbreviations are shown in Table 2 and Table 3.

| Traits | A      |         |        |        | B      |        |        |       | C      |        |        |        | D      |         |        |        |
|--------|--------|---------|--------|--------|--------|--------|--------|-------|--------|--------|--------|--------|--------|---------|--------|--------|
|        | Min    | Max     | M      | SD     | Min    | Max    | M      | SD    | Min    | Max    | M      | SD     | Min    | Max     | M      | SD     |
| TH     | 2.60   | 10.70   | 5.94   | 1.59   | 3.90   | 4.90   | 4.47   | 0.34  | 2.70   | 6.30   | 4.21   | 1.09   | 3.80   | 12.70   | 7.65   | 2.58   |
| CrD    | 160.00 | 900.00  | 386.97 | 163.13 | 335.00 | 495.00 | 402.50 | 65.86 | 247.00 | 530.00 | 343.81 | 76.34  | 182.50 | 1175.00 | 505.78 | 211.53 |
| DBH    | 4.00   | 55.00   | 23.81  | 12.67  | 8.00   | 13.00  | 9.50   | 1.87  | 0.00   | 0.00   | 0.00   | 0.00   | 11.00  | 82.00   | 40.28  | 18.66  |
| UBH    | 7.00   | 335.00  | 122.78 | 70.06  | 140.00 | 210.00 | 169.17 | 24.06 | 0.00   | 0.00   | 0.00   | 0.00   | 43.00  | 485.00  | 172.62 | 112.88 |
| BA     | 10.50  | 110.50  | 44.82  | 20.50  | 37.40  | 60.20  | 48.78  | 7.46  | 0.00   | 0.00   | 0.00   | 0.00   | 18.70  | 105.00  | 45.41  | 21.01  |
| BN     | 2.00   | 5.00    | 2.86   | 0.92   | 2.00   | 4.00   | 2.50   | 0.84  | 0.00   | 0.00   | 0.00   | 0.00   | 2.00   | 5.00    | 2.59   | 0.87   |
| LL     | 23.56  | 52.49   | 36.55  | 7.73   | 32.46  | 42.40  | 38.86  | 3.47  | 25.34  | 54.54  | 36.32  | 8.13   | 28.37  | 65.58   | 45.45  | 7.91   |
| LW     | 9.83   | 20.70   | 14.48  | 2.66   | 9.55   | 13.76  | 12.15  | 1.50  | 9.95   | 20.61  | 14.61  | 2.52   | 13.68  | 27.50   | 19.57  | 3.09   |
| LTh    | 0.12   | 0.22    | 0.17   | 0.03   | 0.19   | 0.21   | 0.20   | 0.01  | 0.12   | 0.23   | 0.17   | 0.03   | 0.10   | 0.22    | 0.16   | 0.03   |
| PL     | 6.03   | 13.27   | 8.67   | 1.74   | 8.44   | 9.35   | 8.86   | 0.40  | 6.46   | 11.53  | 9.13   | 1.32   | 7.22   | 16.46   | 11.43  | 2.43   |
| LSI    | 1.85   | 3.85    | 2.59   | 0.48   | 3.00   | 3.48   | 3.28   | 0.18  | 2.10   | 3.54   | 2.54   | 0.38   | 1.85   | 3.34    | 2.37   | 0.37   |
| LA     | 214.29 | 1177.86 | 445.90 | 206.07 | 237.60 | 464.94 | 379.88 | 82.08 | 191.40 | 797.80 | 391.93 | 153.80 | 332.53 | 1288.27 | 735.25 | 228.11 |
| ABL    | 4.60   | 17.20   | 9.58   | 2.61   | 4.85   | 7.01   | 5.56   | 0.79  | 4.97   | 15.48  | 10.07  | 2.54   | 9.42   | 20.01   | 13.79  | 2.59   |
| NFC    | 3.00   | 14.00   | 9.19   | 2.36   | 4.00   | 7.00   | 5.33   | 1.03  | 6.00   | 15.00  | 9.94   | 2.49   | 7.00   | 14.00   | 9.66   | 1.91   |
| RFB    | 0.53   | 1.51    | 1.00   | 0.25   | 0.79   | 1.12   | 0.94   | 0.14  | 0.55   | 1.57   | 1.04   | 0.25   | 0.53   | 0.93    | 0.72   | 0.10   |
| FD     | 7.14   | 11.78   | 9.27   | 1.11   | 9.24   | 10.18  | 9.60   | 0.31  | 7.75   | 10.89  | 9.50   | 0.99   | 7.65   | 12.24   | 9.92   | 1.05   |
| CTL    | 3.05   | 5.14    | 4.37   | 0.51   | 4.03   | 4.83   | 4.61   | 0.30  | 3.50   | 5.40   | 4.33   | 0.55   | 3.40   | 5.60    | 4.53   | 0.59   |
| CTW    | 1.79   | 3.36    | 2.53   | 0.39   | 2.98   | 3.47   | 3.14   | 0.17  | 2.07   | 3.86   | 2.74   | 0.47   | 2.30   | 4.78    | 3.31   | 0.54   |
| FSL    | 1.86   | 5.56    | 3.56   | 0.98   | 2.64   | 4.71   | 3.25   | 0.79  | 2.11   | 5.02   | 3.40   | 0.94   | 2.46   | 8.90    | 5.14   | 1.63   |
| FCN    | 1.00   | 3.00    | 1.78   | 0.67   | 1.00   | 3.00   | 2.17   | 0.75  | 1.00   | 3.00   | 1.89   | 0.58   | 1.00   | 3.00    | 1.62   | 0.62   |
| FNAL   | 3.00   | 3.00    | 3.00   | 0.00   | 1.00   | 1.00   | 1.00   | 0.00  | 3.00   | 3.00   | 3.00   | 0.00   | 3.00   | 3.00    | 3.00   | 0.00   |
| TT     | 3.00   | 3.00    | 3.00   | 0.00   | 3.00   | 3.00   | 3.00   | 0.00  | 1.00   | 2.00   | 1.44   | 0.51   | 3.00   | 3.00    | 3.00   | 0.00   |
| CR     | 1.00   | 3.00    | 1.59   | 0.83   | 1.00   | 1.00   | 1.00   | 0.00  | 1.00   | 3.00   | 1.89   | 0.76   | 1.00   | 3.00    | 1.72   | 0.84   |
| CaDe   | 1.00   | 3.00    | 1.89   | 0.81   | 1.00   | 2.00   | 1.17   | 0.41  | 1.00   | 3.00   | 2.22   | 0.73   | 1.00   | 3.00    | 2.07   | 0.80   |
| TGV    | 1.00   | 3.00    | 2.46   | 0.65   | 3.00   | 3.00   | 3.00   | 0.00  | 1.00   | 3.00   | 2.83   | 0.51   | 1.00   | 3.00    | 2.31   | 0.71   |
| BT     | 1.00   | 2.00    | 1.41   | 0.50   | 1.00   | 2.00   | 1.83   | 0.41  | 1.00   | 2.00   | 1.44   | 0.51   | 1.00   | 2.00    | 1.10   | 0.31   |
| BC     | 1.00   | 4.00    | 2.65   | 0.92   | 3.00   | 4.00   | 3.67   | 0.52  | 2.00   | 4.00   | 3.44   | 0.86   | 1.00   | 4.00    | 3.00   | 1.07   |
| LS     | 1.00   | 5.00    | 3.05   | 1.49   | 4.00   | 5.00   | 4.17   | 0.41  | 1.00   | 4.00   | 2.94   | 1.26   | 1.00   | 4.00    | 2.72   | 1.31   |
| LAS    | 1.00   | 2.00    | 1.65   | 0.48   | 2.00   | 2.00   | 2.00   | 0.00  | 1.00   | 2.00   | 1.67   | 0.49   | 1.00   | 2.00    | 1.48   | 0.51   |
| SL     | 1.00   | 3.00    | 2.03   | 0.80   | 1.00   | 3.00   | 1.83   | 0.75  | 1.00   | 3.00   | 2.17   | 0.79   | 1.00   | 3.00    | 2.07   | 0.75   |
| LUSC   | 1.00   | 7.00    | 4.05   | 1.89   | 2.00   | 7.00   | 5.00   | 1.67  | 1.00   | 7.00   | 3.94   | 2.10   | 1.00   | 7.00    | 4.03   | 1.78   |
| LLSC   | 1.00   | 3.00    | 1.65   | 0.54   | 1.00   | 2.00   | 1.50   | 0.55  | 1.00   | 3.00   | 1.61   | 0.70   | 1.00   | 3.00    | 1.83   | 0.85   |
| PSS    | 1.00   | 2.00    | 1.19   | 0.40   | 1.00   | 1.00   | 1.00   | 0.00  | 1.00   | 2.00   | 1.50   | 0.51   | 1.00   | 2.00    | 1.14   | 0.35   |
| FDD    | 1.00   | 3.00    | 2.27   | 0.77   | 1.00   | 2.00   | 1.83   | 0.41  | 1.00   | 3.00   | 2.61   | 0.78   | 1.00   | 3.00    | 2.28   | 0.84   |
| FC     | 1.00   | 5.00    | 3.32   | 1.27   | 1.00   | 3.00   | 2.00   | 1.10  | 1.00   | 5.00   | 2.83   | 1.34   | 1.00   | 5.00    | 3.10   | 1.29   |
