# Supplementary material for: Phenotypic Diversity Analysis in Elaeagnus angustifolia Populations in Gansu Province, China
Source: MDPI journal article supplement (doi:10.3390/f14061143), 2023-05-31
Supplement: s1 [file s1]

**Table S3.** Principal component vectors, eigenvalues, contribution rate and cumulative contribution rate of first 11 principal components based on tree means for the 35 traits.

| Traits        | Component |        |        |        |        |        |        |        |        |        |        |
|---------------|-----------|--------|--------|--------|--------|--------|--------|--------|--------|--------|--------|
|               | 1         | 2      | 3      | 4      | 5      | 6      | 7      | 8      | 9      | 10     | 11     |
| TH            | 0.529     | 0.258  | -0.539 | -0.017 | 0.275  | 0.172  | 0.166  | -0.107 | -0.295 | 0.135  | 0.053  |
| CrD           | 0.38      | 0.344  | -0.436 | -0.018 | 0.372  | 0.202  | 0.025  | -0.197 | 0.022  | 0.102  | 0.095  |
| DBH           | 0.448     | 0.338  | -0.512 | -0.168 | 0.088  | 0.206  | 0.103  | 0.102  | 0.024  | 0.079  | 0.227  |
| UBH           | 0.217     | 0.021  | -0.484 | 0.308  | 0.054  | 0.092  | -0.03  | 0.126  | -0.126 | -0.329 | 0.073  |
| BA            | -0.009    | -0.097 | -0.352 | 0.142  | -0.157 | -0.039 | 0.613  | 0.253  | 0.172  | 0.046  | -0.156 |
| BN            | -0.112    | -0.087 | -0.152 | 0.045  | -0.42  | -0.09  | 0.492  | 0.2    | 0.05   | 0.141  | -0.134 |
| LL            | 0.576     | -0.497 | 0.192  | 0.415  | -0.122 | 0.133  | -0.084 | -0.139 | 0.101  | -0.029 | -0.013 |
| LW            | 0.77      | -0.359 | 0.025  | -0.101 | -0.111 | -0.037 | -0.14  | 0.052  | 0.227  | -0.068 | 0.028  |
| LTh           | -0.313    | -0.207 | 0.064  | -0.12  | 0.47   | 0.219  | -0.272 | 0.234  | -0.047 | -0.106 | 0.13   |
| PL            | 0.69      | -0.101 | 0.063  | 0.159  | -0.071 | -0.022 | -0.042 | -0.061 | 0.388  | -0.181 | -0.063 |
| LSI           | -0.314    | -0.196 | 0.211  | 0.685  | 0.064  | 0.207  | 0.119  | -0.237 | -0.127 | 0.063  | -0.046 |
| LA            | 0.737     | -0.387 | 0.151  | 0.076  | -0.073 | 0.01   | -0.022 | -0.213 | 0.12   | -0.033 | -0.012 |
| ABL           | 0.839     | 0.022  | 0.208  | 0.118  | -0.171 | -0.054 | 0.09   | 0.035  | -0.139 | -0.032 | 0.012  |
| NFC           | 0.451     | 0.439  | 0.179  | 0.046  | -0.438 | 0.321  | -0.042 | -0.115 | 0.049  | 0.11   | -0.004 |
| RFB           | -0.496    | 0.407  | -0.096 | -0.079 | -0.302 | 0.358  | -0.176 | -0.229 | 0.258  | 0.147  | -0.03  |
| FD            | 0.19      | 0.019  | 0.484  | 0.198  | 0.279  | -0.039 | 0.01   | 0.425  | -0.252 | 0.206  | 0.157  |
| CTL           | 0.121     | -0.041 | 0.372  | -0.188 | 0.319  | -0.131 | 0.23   | -0.042 | 0.296  | 0.448  | 0.086  |
| CTW           | 0.439     | -0.173 | 0.103  | 0.028  | 0.452  | 0.308  | 0.061  | 0.287  | 0.109  | 0.223  | -0.209 |
| FSL           | 0.631     | -0.114 | 0.203  | 0.071  | 0.117  | 0.029  | -0.155 | 0.083  | 0.014  | 0.113  | -0.325 |
| FCN           | -0.049    | 0.161  | 0.386  | 0.082  | 0.132  | -0.334 | 0.062  | -0.315 | 0.322  | -0.035 | 0.433  |
| FNAL          | 0.422     | 0.274  | -0.017 | -0.376 | -0.555 | -0.054 | -0.095 | 0.137  | -0.253 | 0.044  | 0.039  |
| TT            | 0.255     | -0.39  | -0.243 | -0.022 | 0.251  | -0.146 | 0.042  | -0.368 | -0.318 | 0.338  | 0.042  |
| CR            | 0.27      | 0.634  | 0.221  | 0.178  | 0.073  | 0.065  | 0.013  | -0.105 | -0.223 | -0.189 | -0.234 |
| CaDe          | 0.233     | 0.63   | 0.432  | 0.05   | -0.028 | 0.047  | 0.249  | -0.187 | -0.241 | -0.145 | -0.093 |
| TGV           | -0.166    | 0.362  | 0.682  | 0.094  | 0.222  | 0.17   | 0.012  | -0.128 | -0.113 | -0.087 | -0.09  |
| BT            | -0.469    | 0.023  | -0.026 | 0.106  | 0.049  | 0.135  | -0.108 | -0.05  | 0.141  | 0.209  | -0.548 |
| BC            | 0.032     | 0.271  | -0.2   | 0.146  | 0.339  | 0.36   | 0.067  | 0.189  | 0.321  | -0.408 | -0.004 |
| LS            | -0.192    | -0.289 | -0.207 | 0.554  | -0.159 | 0.337  | 0.069  | -0.089 | -0.056 | 0.2    | 0.12   |
| LAS           | -0.192    | -0.214 | -0.044 | 0.614  | -0.246 | 0.251  | -0.047 | 0.046  | -0.04  | 0.018  | 0.3    |
| SL            | 0.142     | 0.552  | -0.206 | 0.355  | 0.101  | -0.362 | -0.263 | 0.144  | 0.184  | 0.132  | -0.069 |
| LUSC          | -0.126    | -0.571 | 0.26   | -0.394 | 0.001  | 0.399  | 0.287  | -0.017 | -0.1   | -0.154 | 0.04   |
| LLSC          | 0.053     | -0.524 | 0.206  | -0.44  | -0.011 | 0.266  | 0.087  | -0.095 | -0.055 | -0.193 | -0.057 |
| PSS           | -0.008    | 0.173  | 0.504  | 0.139  | -0.228 | 0.154  | -0.096 | 0.502  | -0.029 | 0.162  | 0.208  |
| FDD           | 0.045     | 0.482  | 0.181  | -0.286 | -0.017 | 0.464  | 0.257  | -0.076 | 0.223  | 0.168  | 0.171  |
| FC            | 0.077     | -0.128 | -0.169 | -0.227 | -0.195 | 0.341  | -0.578 | -0.003 | -0.026 | 0.222  | -0.008 |
| Eigenvalue    | 5.36      | 3.91   | 3.21   | 2.48   | 2.15   | 1.8    | 1.57   | 1.35   | 1.25   | 1.17   | 1.07   |
| % of Variance | 15.32     | 11.16  | 9.17   | 7.09   | 6.13   | 5.15   | 4.47   | 3.87   | 3.57   | 3.36   | 3.05   |
| Cumulative %  | 15.32     | 26.48  | 35.65  | 42.74  | 48.87  | 54.02  | 58.49  | 62.36  | 65.93  | 69.28  | 72.33  |

Phenotypic trait abbreviations are shown in Table 2 and Table 3.
