# Supplementary material for: Phenotypic Diversity Analysis in Elaeagnus angustifolia Populations in Gansu Province, China
Source: MDPI journal article supplement (doi:10.3390/f14061143), 2023-05-31
Supplement: s1 [file s1]

**Table S1.** The mean value, standard deviation and Duncan's multiple comparison of 21 quantitative traits of *Elaeagnus angustifolia* from different populations.

| Traits | DH                              | SZ                            | LZ                               | GZ                              | YC                             | MQ                               | GL                             | QLH                             | YJ                             | LX                             | Total             |
|--------|---------------------------------|-------------------------------|----------------------------------|---------------------------------|--------------------------------|----------------------------------|--------------------------------|---------------------------------|--------------------------------|--------------------------------|-------------------|
| TH     | 5.44±<br>2.06 <sup>c</sup>      | 5.78±<br>1.63 <sup>c</sup>    | 5.01±<br>1.38 <sup>c</sup>       | 8.34±<br>0.87 <sup>ab</sup>     | 5.84±<br>0.97 <sup>c</sup>     | 6.38±<br>2.96 <sup>bc</sup>      | 5.2±<br>0.86 <sup>c</sup>      | 6.87±<br>2.27 <sup>abc</sup>    | 8.97±<br>3.29 <sup>a</sup>     | 5.68±<br>2.47 <sup>c</sup>     | 6.05±<br>2.24     |
| CrD    | 449.05±<br>288.14 <sup>ab</sup> | 342.75±<br>87.91 <sup>b</sup> | 287.25±<br>54.68 <sup>b</sup>    | 591±<br>66.11 <sup>a</sup>      | 481.5±<br>205.15 <sup>ab</sup> | 452.5±<br>120.18 <sup>ab</sup>   | 371.2±<br>78.71 <sup>b</sup>   | 376.43±<br>215.39 <sup>b</sup>  | 386.67±<br>265.02 <sup>b</sup> | 492.22±<br>197.3 <sup>ab</sup> | 417.66±<br>173.89 |
| DBH    | 26.3±<br>15.98 <sup>abc</sup>   | 31.75±<br>6.76 <sup>abc</sup> | 25.75±<br>6.86 <sup>abc</sup>    | 43.6±<br>6.58 <sup>a</sup>      | 25±<br>6.48 <sup>abc</sup>     | 41±<br>23.84 <sup>ab</sup>       | 18.75±<br>13.15 <sup>bc</sup>  | 24.71±<br>23.52 <sup>abc</sup>  | 33.67±<br>25.58 <sup>abc</sup> | 15.78±<br>12.13 <sup>c</sup>   | 29.25±<br>17.8    |
| UBH    | 134.9±<br>41.74 <sup>b</sup>    | 139±<br>105.4 <sup>b</sup>    | 108.13±<br>46.42 <sup>b</sup>    | 305.6±<br>146.27 <sup>a</sup>   | 112.25±<br>63.07 <sup>b</sup>  | 130.79±<br>43.16 <sup>b</sup>    | 74.25±<br>28.69 <sup>b</sup>   | 163.29±<br>155.85 <sup>b</sup>  | 182±<br>82.78 <sup>b</sup>     | 160.44±<br>37.52 <sup>b</sup>  | 146.72±<br>90.39  |
| BA     | 48.43±<br>22.89 <sup>a</sup>    | 53.99±<br>15.14 <sup>a</sup>  | 43.86±<br>19.83 <sup>a</sup>     | 30.4±<br>7.26 <sup>a</sup>      | 40.18±<br>8.19 <sup>a</sup>    | 53.07±<br>25.64 <sup>a</sup>     | 37±<br>14.07 <sup>a</sup>      | 40.79±<br>26.28 <sup>a</sup>    | 43.93±<br>13.94 <sup>a</sup>   | 42.19±<br>13.25 <sup>a</sup>   | 45.39±<br>19.81   |
| BN     | 2.9±<br>1.1 <sup>a</sup>        | 3±<br>0.93 <sup>a</sup>       | 2.75±<br>0.89 <sup>a</sup>       | 2.2±<br>0.45 <sup>a</sup>       | 2.5±<br>1 <sup>a</sup>         | 2.79±<br>1.05 <sup>a</sup>       | 3±<br>0.82 <sup>a</sup>        | 2.57±<br>0.79 <sup>a</sup>      | 3±<br>1 <sup>a</sup>           | 2.44±<br>0.73 <sup>a</sup>     | 2.72±<br>0.89     |
| LL     | 42.89±<br>7.9 <sup>ab</sup>     | 32.93±<br>4.8 <sup>cd</sup>   | 41.72±<br>11.01 <sup>abc</sup>   | 43.26±<br>11.97 <sup>ab</sup>   | 42.61±<br>10.49 <sup>ab</sup>  | 38.4±<br>6.78 <sup>abcd</sup>    | 39.66±<br>6.54 <sup>abcd</sup> | 47.47±<br>9.6 <sup>a</sup>      | 32.1±<br>3.71 <sup>d</sup>     | 35.14±<br>6.26 <sup>bcd</sup>  | 39.52±<br>8.62    |
| LW     | 16.74±<br>3.41 <sup>ab</sup>    | 13.85±<br>1.82 <sup>bc</sup>  | 17.28±<br>4.76 <sup>ab</sup>     | 18.08±<br>3.97 <sup>ab</sup>    | 19.32±<br>4.46 <sup>a</sup>    | 16.29±<br>4.08 <sup>abc</sup>    | 15.7±<br>2.29 <sup>abc</sup>   | 16.92±<br>3.12 <sup>ab</sup>    | 14.63±<br>1.1 <sup>bc</sup>    | 12.41±<br>1.84 <sup>c</sup>    | 15.99±<br>3.7     |
| LTh    | 0.15±<br>0.02 <sup>c</sup>      | 0.15±<br>0.02 <sup>c</sup>    | 0.15±<br>0.03 <sup>c</sup>       | 0.16±<br>0.03 <sup>bc</sup>     | 0.16±<br>0.02 <sup>bc</sup>    | 0.17±<br>0.03 <sup>bc</sup>      | 0.19±<br>0.03 <sup>ab</sup>    | 0.15±<br>0.02 <sup>c</sup>      | 0.19±<br>0.01 <sup>ab</sup>    | 0.2±<br>0.01 <sup>a</sup>      | 0.17±<br>0.03     |
| PL     | 10.03±<br>2.35 <sup>abc</sup>   | 8.67±<br>1.94 <sup>c</sup>    | 10.49±<br>2.51 <sup>abc</sup>    | 12.25±<br>3.02 <sup>a</sup>     | 11.93±<br>2.96 <sup>ab</sup>   | 9.62±<br>1.99 <sup>bc</sup>      | 8.48±<br>1.56 <sup>c</sup>     | 9.49±<br>1.58 <sup>c</sup>      | 8.64±<br>0.66 <sup>c</sup>     | 8.6±<br>0.89 <sup>c</sup>      | 9.66±<br>2.23     |
| LSI    | 2.64±<br>0.45 <sup>abc</sup>    | 2.43±<br>0.34 <sup>abc</sup>  | 2.46±<br>0.41 <sup>abc</sup>     | 2.39±<br>0.21 <sup>bc</sup>     | 2.26±<br>0.33 <sup>c</sup>     | 2.46±<br>0.45 <sup>abc</sup>     | 2.61±<br>0.47 <sup>abc</sup>   | 2.88±<br>0.44 <sup>ab</sup>     | 2.23±<br>0.28 <sup>c</sup>     | 2.94±<br>0.6 <sup>a</sup>      | 2.55±<br>0.46     |
| LA     | 669.78±<br>310.5 <sup>ab</sup>  | 384.32±<br>93.76 <sup>d</sup> | 641.17±<br>235.46 <sup>abc</sup> | 689.78±<br>321.66 <sup>ab</sup> | 747.01±<br>350.8 <sup>a</sup>  | 453.88±<br>190.16 <sup>bcd</sup> | 412.46±<br>96.33 <sup>cd</sup> | 698.19±<br>244.67 <sup>ab</sup> | 388.1±<br>50.19 <sup>d</sup>   | 343.84±<br>88.07 <sup>d</sup>  | 523.94±<br>245.87 |
| ABL    | 10.47±<br>2.73 <sup>bc</sup>    | 8.39±<br>3.38 <sup>cd</sup>   | 13.27±<br>3.39 <sup>ab</sup>     | 13.92±<br>3.25 <sup>a</sup>     | 13.77±<br>2.86 <sup>a</sup>    | 9.97±<br>2.18 <sup>c</sup>       | 10.86±<br>1.5 <sup>abc</sup>   | 13.13±<br>3.05 <sup>ab</sup>    | 13.83±<br>2.53 <sup>a</sup>    | 6.37±<br>1.93 <sup>d</sup>     | 10.77±<br>3.41    |
| NFC    | 9.64±<br>1.69 <sup>ab</sup>     | 8.2±<br>1.14 <sup>bc</sup>    | 9.4±<br>1.9 <sup>ab</sup>        | 10.4±<br>0.55 <sup>ab</sup>     | 10.6±<br>1.14 <sup>ab</sup>    | 8.85±<br>2.52 <sup>bc</sup>      | 10±<br>2.54 <sup>ab</sup>      | 9.43±<br>2.3 <sup>ab</sup>      | 12±<br>2.65 <sup>a</sup>       | 6.56±<br>3.05 <sup>c</sup>     | 9.17±<br>2.38     |
| RFB    | 1.02±<br>0.25 <sup>a</sup>      | 1.1±<br>0.28 <sup>ab</sup>    | 0.79±<br>0.27 <sup>bc</sup>      | 0.83±<br>0.25 <sup>abc</sup>    | 0.8±<br>0.16 <sup>bc</sup>     | 0.92±<br>0.25 <sup>abc</sup>     | 0.9±<br>0.15 <sup>abc</sup>    | 0.72±<br>0.11 <sup>c</sup>      | 0.9±<br>0.14 <sup>abc</sup>    | 0.98±<br>0.24 <sup>abc</sup>   | 0.91±<br>0.24     |
| FD     | 8.59±<br>1.13 <sup>c</sup>      | 8.75±<br>0.65 <sup>c</sup>    | 10.26±<br>0.93 <sup>ab</sup>     | 9.83±<br>0.72 <sup>ab</sup>     | 9.58±<br>1.78 <sup>bc</sup>    | 9.44±<br>0.84 <sup>bc</sup>      | 10.11±<br>0.82 <sup>ab</sup>   | 10.73±<br>0.57 <sup>a</sup>     | 9.25±<br>0.84 <sup>bc</sup>    | 9.41±<br>0.44 <sup>bc</sup>    | 9.55±<br>1.05     |
| CTL    | 4.18±<br>0.49 <sup>bc</sup>     | 4.26±<br>0.62 <sup>bc</sup>   | 4.77±<br>0.63 <sup>ab</sup>      | 3.95±<br>0.5 <sup>c</sup>       | 5.03±<br>0.37 <sup>a</sup>     | 4.31±<br>0.45 <sup>bc</sup>      | 4.56±<br>0.47 <sup>ab</sup>    | 4.44±<br>0.44 <sup>bc</sup>     | 4.2±<br>0.56 <sup>bc</sup>     | 4.66±<br>0.26 <sup>ab</sup>    | 4.43±<br>0.53     |
| CTW    | 2.38±<br>0.31 <sup>e</sup>      | 2.31±<br>0.23 <sup>e</sup>    | 2.66±<br>0.27 <sup>cde</sup>     | 2.69±<br>0.29 <sup>bcde</sup>   | 3.51±<br>0.52 <sup>a</sup>     | 3.09±<br>0.73 <sup>abcd</sup>    | 3.22±<br>0.31 <sup>ab</sup>    | 3.16±<br>0.42 <sup>abc</sup>    | 2.55±<br>0.43 <sup>de</sup>    | 3.01±<br>0.29 <sup>abcd</sup>  | 2.86±<br>0.56     |
| FSL    | 3.39±<br>0.95 <sup>de</sup>     | 3.52±<br>0.49 <sup>de</sup>   | 5.22±<br>1.96 <sup>abc</sup>     | 5.78±<br>1.15 <sup>a</sup>      | 5.55±<br>2.48 <sup>ab</sup>    | 3.89±<br>1.16 <sup>cde</sup>     | 4.37±<br>0.64 <sup>bcd</sup>   | 3.09±<br>0.62 <sup>de</sup>     | 2.88±<br>0.75 <sup>e</sup>     | 3.16±<br>0.91 <sup>de</sup>    | 4.02±<br>1.43     |
| FCN    | 1.73±<br>0.65 <sup>b</sup>      | 1.5±<br>0.71 <sup>b</sup>     | 2.5±<br>0.85 <sup>a</sup>        | 1.8±<br>0.45 <sup>ab</sup>      | 1.8±<br>0.45 <sup>ab</sup>     | 1.6±<br>0.5 <sup>b</sup>         | 1.7±<br>0.48 <sup>b</sup>      | 1.57±<br>0.54 <sup>b</sup>      | 1.67±<br>0.58 <sup>b</sup>     | 2±<br>0.71 <sup>ab</sup>       | 1.78±<br>0.65     |
| FNAL   | 3±<br>0 <sup>a</sup>            | 3±<br>0 <sup>a</sup>          | 3±<br>0 <sup>a</sup>             | 3±<br>0 <sup>a</sup>            | 3±<br>0 <sup>a</sup>           | 3±<br>0 <sup>a</sup>             | 3±<br>0 <sup>a</sup>           | 3±<br>0 <sup>a</sup>            | 3±<br>0 <sup>a</sup>           | 1.67±<br>1 <sup>b</sup>        | 2.87±<br>0.5      |

Phenotypic trait abbreviations are shown in Table 2. Different letters indicated that the same trait was significantly different among different populations ( $p < 0.05$ ). Phenotypic traits are shown as mean ± standard deviation.
